# Supplementary material
Source: Springer Nature journal article supplement (https://www.springermedizin.de/resource/supplementary/12891_2014_2118_MOESM3_ESM.pdf/9509484)

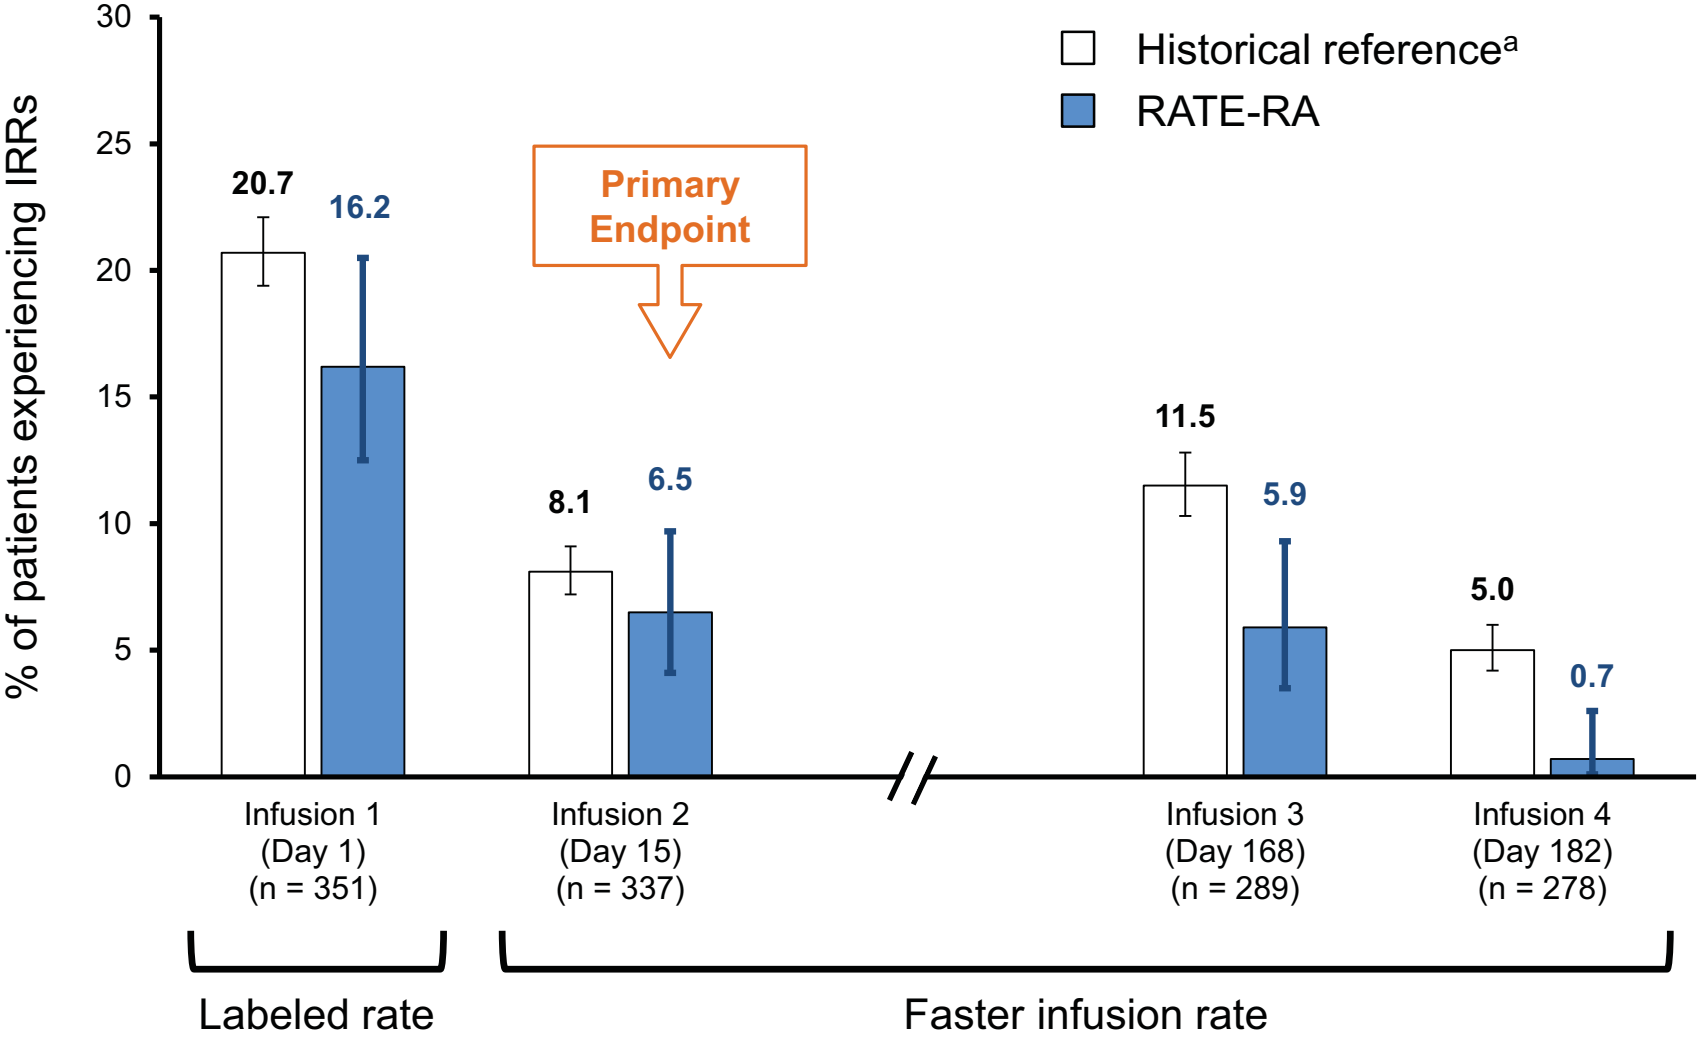

Supplement: MOESM3 [file 9509484]
